# Supplementary material
Source: Springer Nature journal article supplement (https://www.springermedizin.de/resource/supplementary/12879_2012_2086_MOESM1_ESM.pdf/9443518)
Supplement: MOESM1 [file 9443518]

# Admissions for clinical malaria

**N=418**

**Other diagnosis**

**n=250 (60%)**

**Final diagnosis of malaria**

**n=168 (40%)**

Low respiratory tract infection  
**142 (33.9%)**

Gastro enteritis  
**70 (16.7%)**

Urinary infection (UI)  
**10 (2.4%)**

Meningitis  
**14 (3.3%)**

Other  
**14 (3.3%)**

No malaria  
**73 (17.5%)**

Confirmed malaria  
**95 (22.7%)**

No diagnosis  
**44 (60.3%)**

Gastro enteritis  
**4 (5.5%)**

Meningitis  
**2 (2.7%)**

Low respiratory tract infection  
**16 (21.9%)**

VOC  
**7 (9.6%)**

Malaria only  
**72 (75.8%)**

VOC  
**2 (2.1%)**

UI  
**7 (7.4%)**

Low respiratory tract infection  
**14 (14.7%)**
